# Supplementary material for: Mori Cortex regulates P-glycoprotein in Caco-2 cells and colons from rats with experimental colitis via direct and gut microbiota-mediated mechanisms
Source: Royal Society of Chemistry journal article supplement (doi:10.1039/c6ra25448a), 2017-01-01
Supplement: c6ra25448a1.pdf [file c6ra25448a1.pdf]

## Supplementary Document

### **Mori Cortex regulates P-glycoprotein in Caco-2 cells and colons from rats with experimental colitis via direct and gut microbiota-mediated mechanisms**

Wanghui Jing<sup>a,b</sup>, Xuejiao Gao<sup>a</sup>, Beilei Han<sup>a</sup>, Bin Wei<sup>a</sup>, Nan Hu<sup>a</sup>, Sai Li<sup>a</sup>, Ru Yan<sup>a,c</sup> & Yitao

Wang<sup>a,c</sup>

<sup>a</sup>State Key Laboratory of Quality Research in Chinese Medicine, Institute of Chinese Medical Sciences, University of Macau, Taipa, Macao SAR, China. <sup>b</sup>School of Pharmacy, Health Science Center, Xi'an Jiaotong University, No.76, Yanta West Road, Xi'an, Shannxi, The people's Republic of China. <sup>c</sup>UM Zhuhai Research Institute, No.1 Software Road, Zhuhai Hi-tech Zone, Guangdong, China. Correspondence and requests for materials should be addressed to R.Y. ([ruyan@umac.mo](mailto:ruyan@umac.mo))

## **Materials and Methods**

### ***In vitro cytotoxicity and anti-proliferation studies***

Caco-2 cells were cultured in DMEM supplemented with 10% Fetal Bovine Serum (FBS), 1% of a mixture of penicillin and streptomycin (P/S) and 1% nonessential amino acids (NEAA), in an atmosphere containing 5% CO<sub>2</sub> and 90% relative humidity at 37 °C. Cells were sub-cultured every 3-4 days after reaching 80-90% confluence by trypsinization with 0.05% trypsin-EDTA.

The cytotoxicity of MCE and the main components (mulberroside A (MA), oxyresveratrol (Oxy), resveratrol (Res), morusin (Ms), sanggenon C (SC), kuwanon G (KG), Morin) on Caco-2 cells was measured by MTT assay. Caco-2 cells were seeded onto a 96-well plate at a density of  $1 \times 10^4$  cells/well in DMEM culture medium. After 24 h culturing at 37 °C, the medium was replaced with different concentrations of MCE (0-250 µg/mL) or 0-50 µM of components (MA, Oxy, Res, Ms, SC, KG, Morin) dissolved in Hank's balanced salt solution (HBSS)-4-(2-hydroxyethyl)-1-piperazineethane sulfonic acid (HEPES) (10 mM of HEPES, pH 7.4). Then cells were incubated at 37 °C in the CO<sub>2</sub> incubator for 24 h. The solution in each well was aspirated, and the cells were incubated for a further 4 h with 200 µl of MTT solution (1 mg/ml in HBSS-HEPES). The intracellular formazan product was solubilized with 200µl of DMSO, and absorbance was measured at 570 nm using Spectra Max M5 Multi-Mode Microplate Readers (Molecular Devices, USA). And the viability of MCE-exposed cells was expressed as the percentage of the absorbance measured in the

control cells.

For the anti-proliferation study, the cells were seeded on 96-well plates for 24 h followed by incubating with 0-250  $\mu\text{g}/\text{mL}$  of MCE, and 0-50  $\mu\text{M}$  of components (MA, Oxy, Res, Ms, SC, KG, Morin) in culture medium for another 72 h. The cells were then washed thrice with HBSS buffer after medium aspiration, and examined by MTT assay as described above.

## **Supplementary Figures**

**Mori Cortex regulates P-glycoprotein in Caco-2 cells and colons from rats with experimental colitis via direct and gut bacteria-mediated mechanisms**

## **Supplementary Figure legends**

**Supplementary Fig. S1.** Histological assessment of the colon tissues in normal rats (A), rats with colitis (B) and those receiving MCE treatment (C). Representative photomicrographs (H&E staining, original magnification  $\times 40$  &  $\times 100$ ) of colonic tissues showed intact epithelial surface in normal rats and severe destruction of epithelium with inflammatory cell infiltration (a), crypt abscess (b), loss of goblet cells (c) and epithelium (d) in rats with DSS-induced colitis. Treatment with MCE attenuated the extent and severity of cell damage.

**Supplementary Fig. S2.** Cytotoxicity effects of MCE and its major components on Caco-2 cells. Caco-2 cells was exposed to series concentrations of Ms(morusin), KG(kuwanon G), MA (mulberroside A), Oxy(oxyresveratrol), SC (sanggenon C), morin, Res(resveratrol) and MCE (Mori Cortex extract) for 24 h. Cell viability was detected with MTT assay and presented as percent of control. Data were expressed as mean  $\pm$  SD from triplicate experiments.

**Supplementary Fig. S3.** Short-term (a) and long-term (b) effects of main components of MCE on P-gp expression in Caco-2 cells. Cells were treated with 50  $\mu$ M of kuwanon G (KG), morusin (Ms), morin, oxyresveratrol (Oxy), resveratrol (Res), mulberroside A (MA) and sanggenon C (SC) for 24 h or 50  $\mu$ M of MS, morin, MA, SC and KG for 7 days,

respectively. The P-gp expression was evaluated using Western blot. Data represented mean  $\pm$  SD from triplicate experiments. \* $p < 0.05$  vs. control (Ctrl) group (unpaired student's  $t$  test).

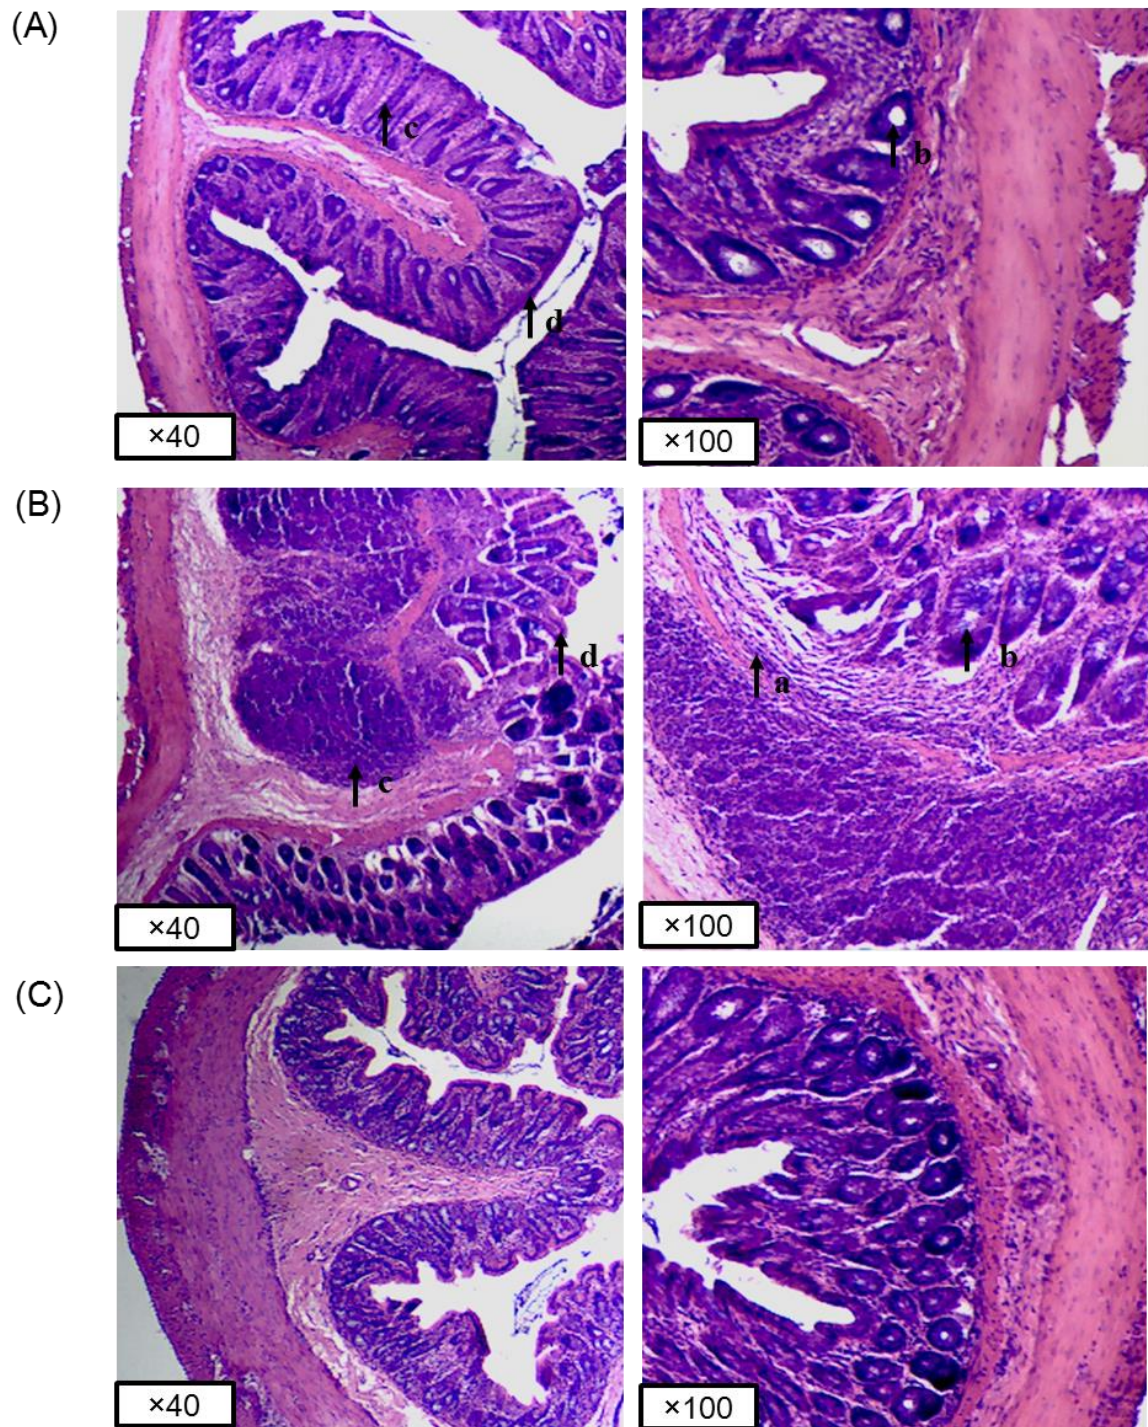

Supplementary Fig. S1

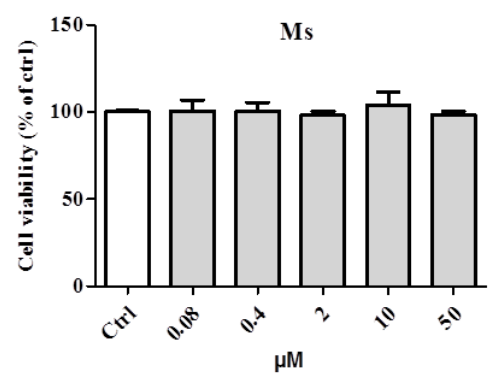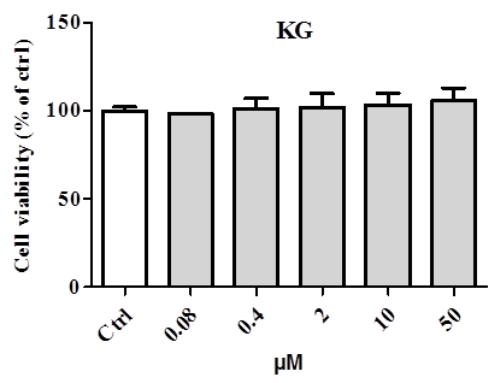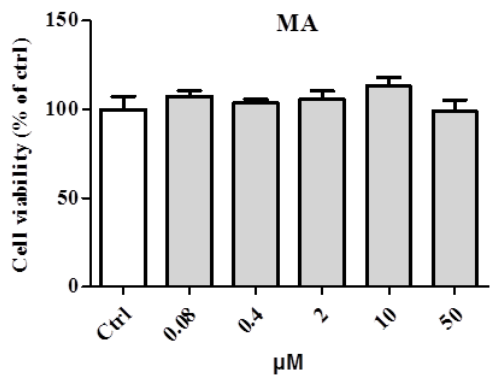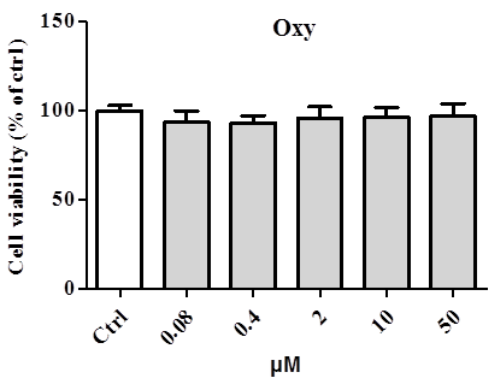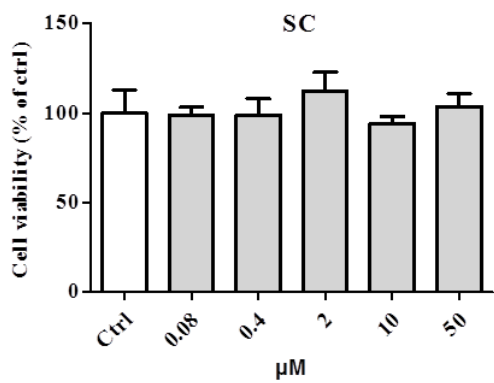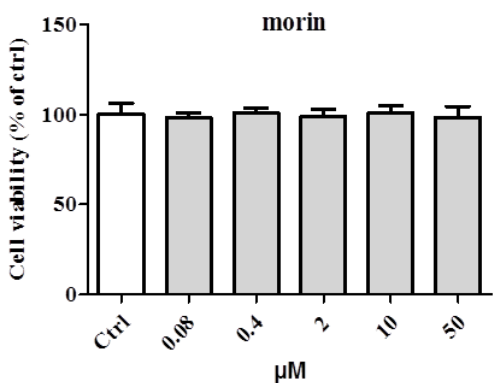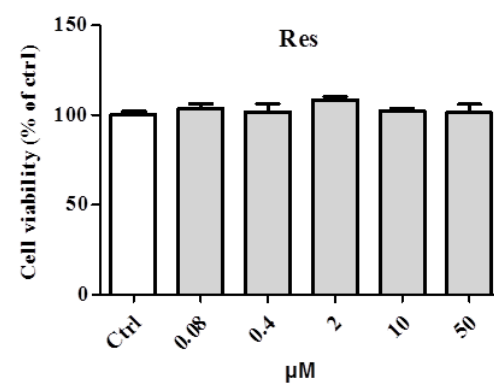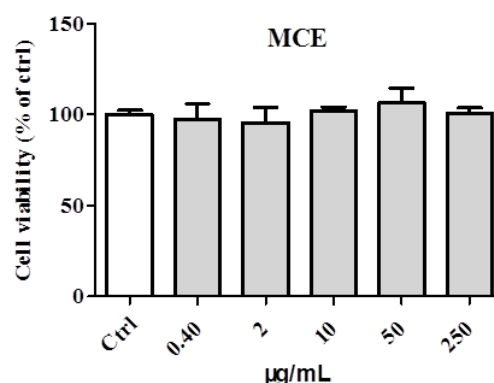

Supplementary Fig.S2



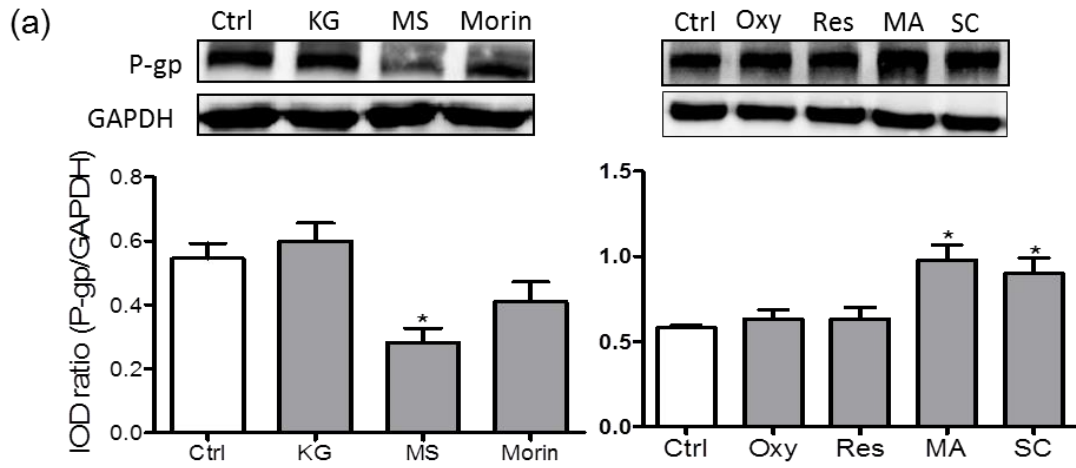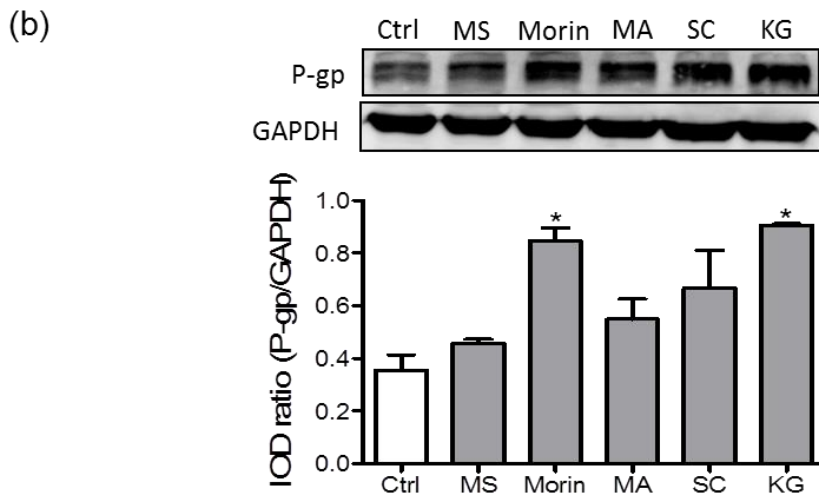

Supplementary Fig.S3
